# Supplementary material
Source: PubMed Central journal article supplement (PMC2787465)

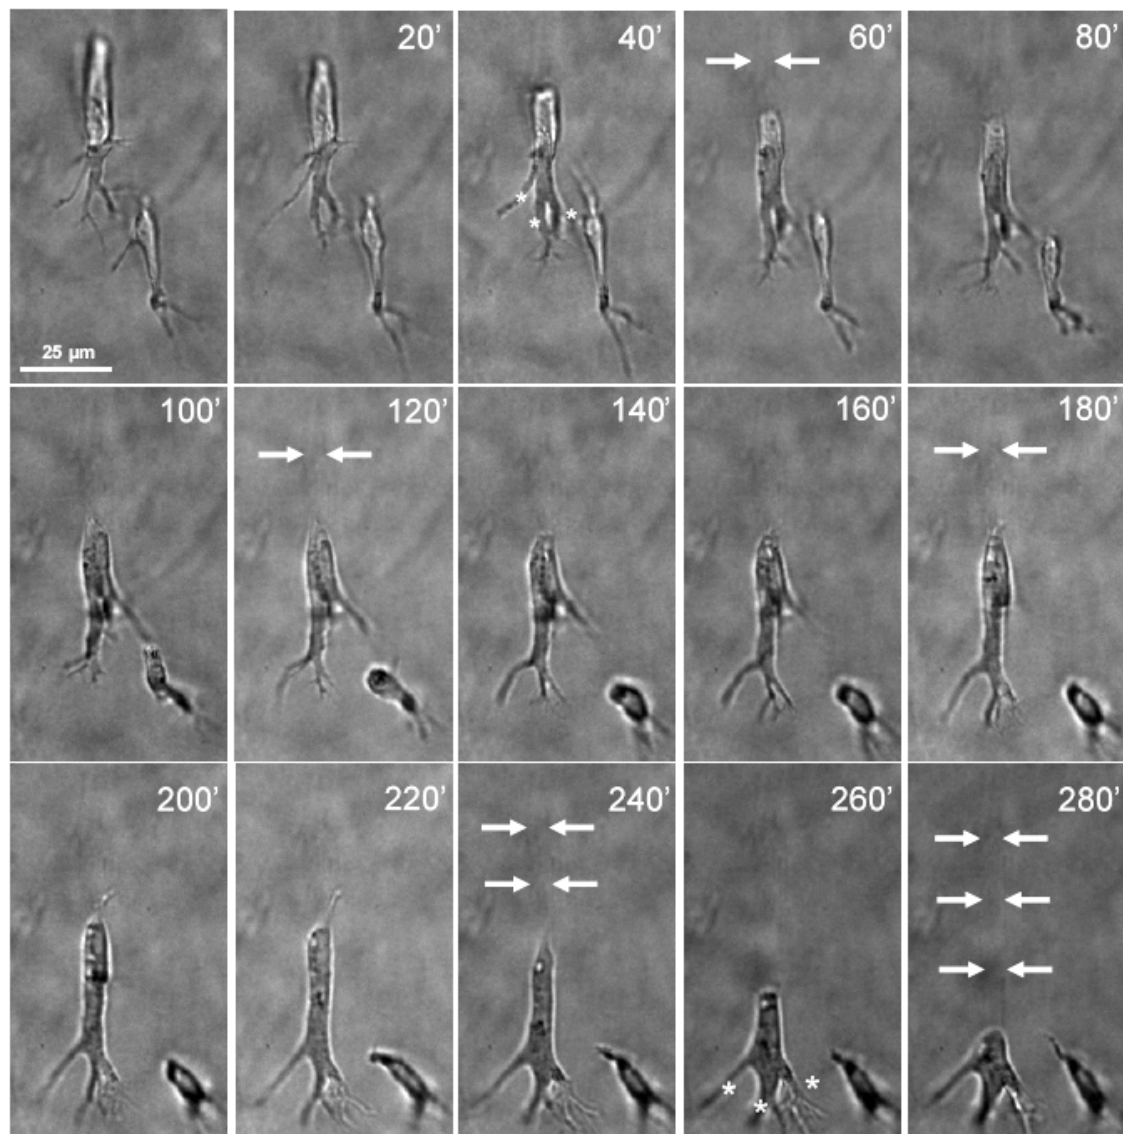

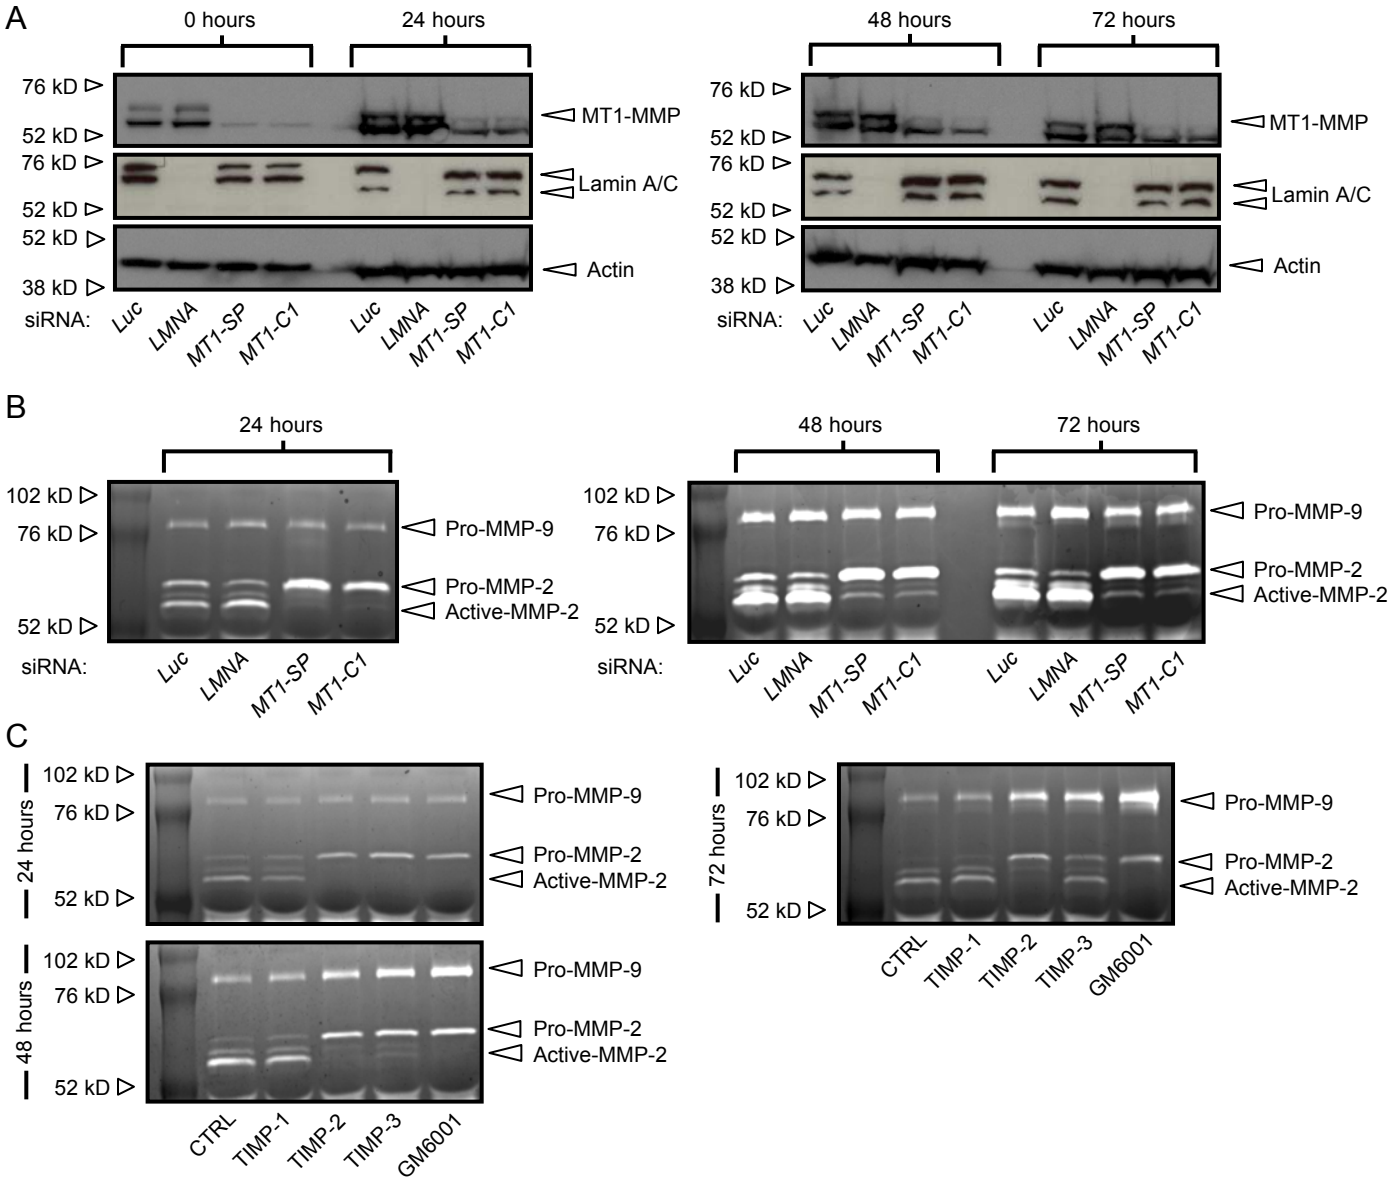

Supplemental Figure 3

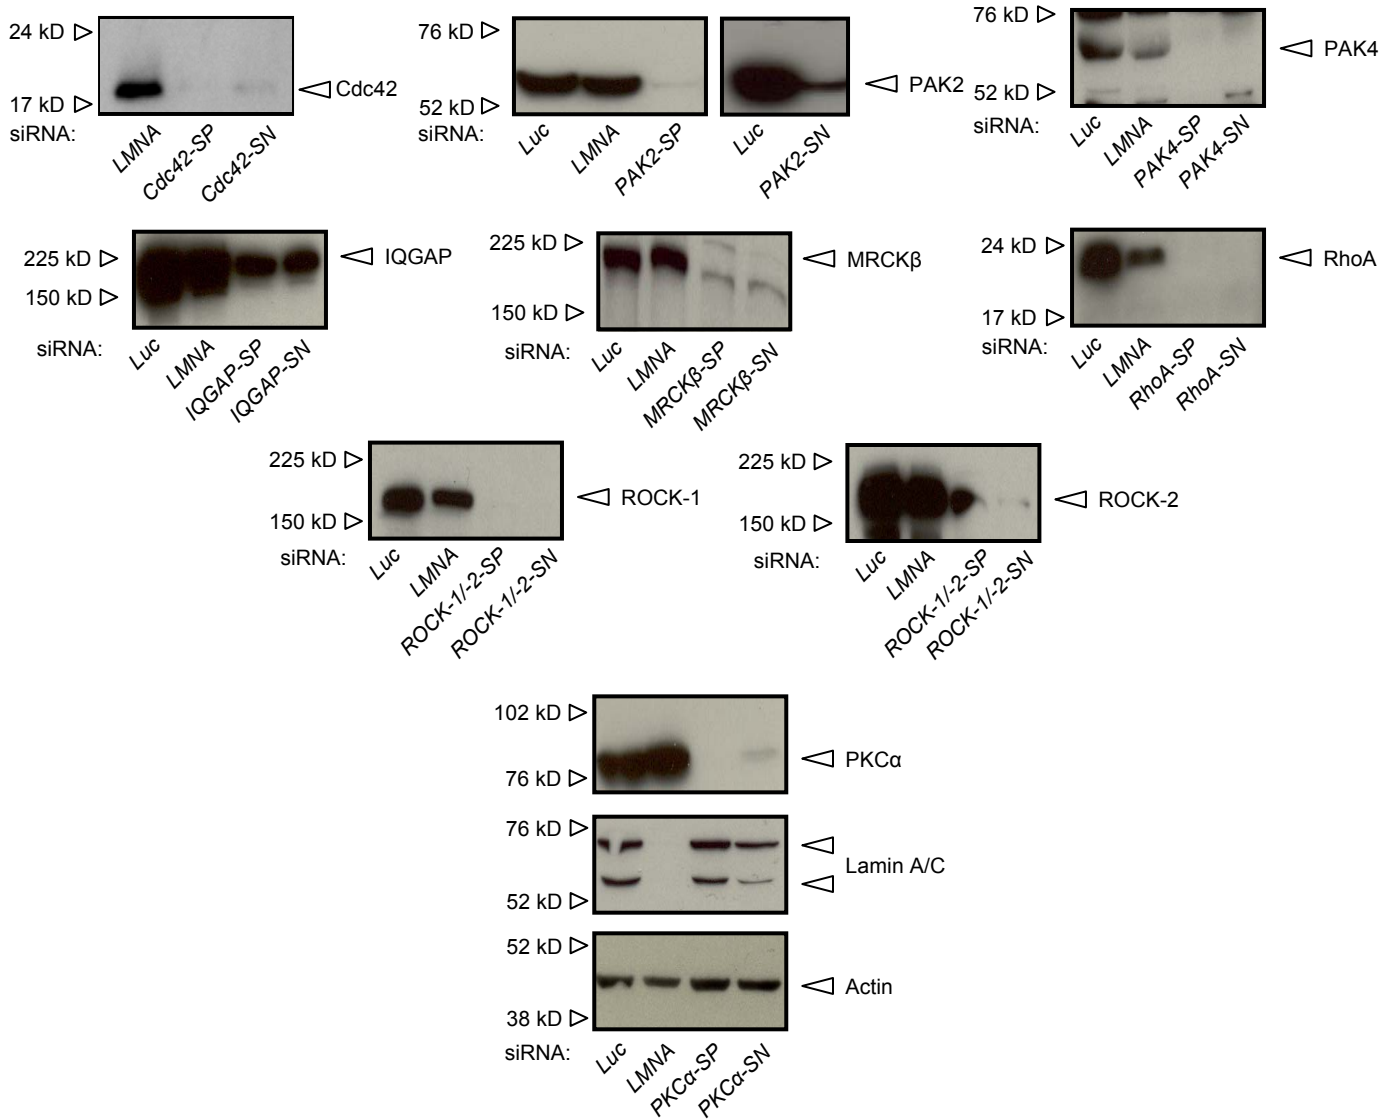

Supplemental Figure 4

Supplement: supp_122_24_4558__2.pdf [file supp_122_24_4558__2.pdf]
